# Supplementary material for: Tailored preparation of WO3nano-grassblades on FTO substrate for photoelectrochemical water splitting
Source: Royal Society of Chemistry journal article supplement (doi:10.1039/c6ce01186a), 2016-01-01
Supplement: c6ce01186a1.pdf [file c6ce01186a1.pdf]

## Electronic Supplementary Information

### Tailored Preparation of WO<sub>3</sub> Nano-grassblades on FTO Substrate for Photoelectrochemical Water Splitting

*Tao Jin<sup>ab</sup>, Di Xu<sup>a</sup>, Peng Diao<sup>a\*</sup>, Wei-ping He<sup>b</sup>, Hao-wei Wang<sup>b</sup>, Sheng-zhi Liao<sup>b</sup>*

*a Key Laboratory of Aerospace Materials and Performance (Ministry of Education), School of Materials Science and Engineering, Beihang University, Beijing 100191, P. R. China*

*b China Special Vehicle Research Institute, Aviation Key Laboratory of Science and Technology on Structural Corrosion Prevention and Control, Jingmen 448035, Hubei, P. R. China*

\* Corresponding author. Tel. & Fax: +86-01-82339562

*E-mail address: pdiao@buaa.edu.cn (P. Diao).*

**Fig. S1**

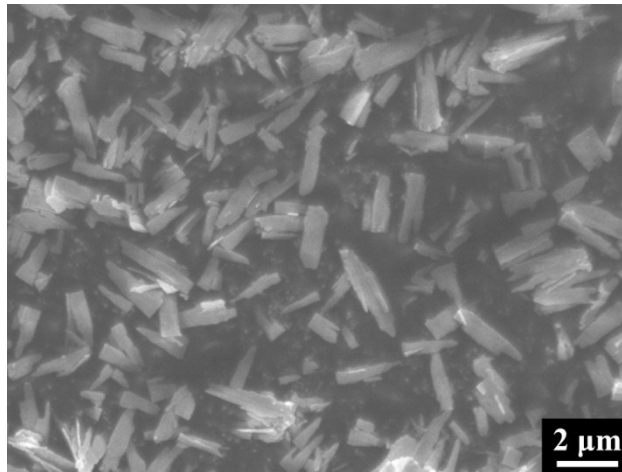

Fig. S1. SEM image of the WO<sub>3</sub> NGs removed by an electrically conductive adhesive tape from the FTO substrate

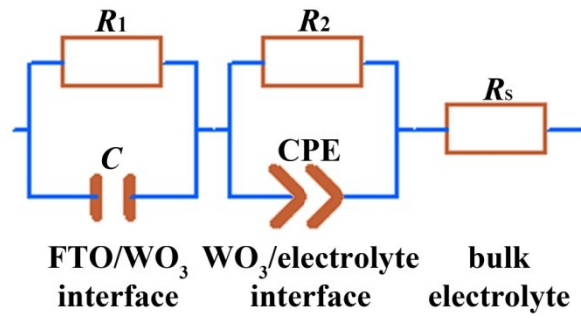

Fig. S2 Equivalent circuit for fitting the EIS spectra

Table S1. Elements of the equivalent circuit for the WO<sub>3</sub> NGs in the dark and under illumination measured in 0.1 M KH<sub>2</sub>PO<sub>4</sub> (pH 7)

|       | $R_1 / \Omega \text{ cm}^2$ | $C / \mu\text{F cm}^{-2}$ | $R_2 / \text{k}\Omega \text{ cm}^2$ | $Q / \mu\text{F cm}^{-2}$ | $n$ | $R_s / \Omega \text{ cm}^2$ |
|-------|-----------------------------|---------------------------|-------------------------------------|---------------------------|-----|-----------------------------|
| dark  | 53.8                        | 0.2                       | 23.8                                | 210.8                     | 0.9 | 7.4                         |
| photo | 53.8                        | 0.2                       | 0.3                                 | 290.5                     | 0.9 | 7.2                         |

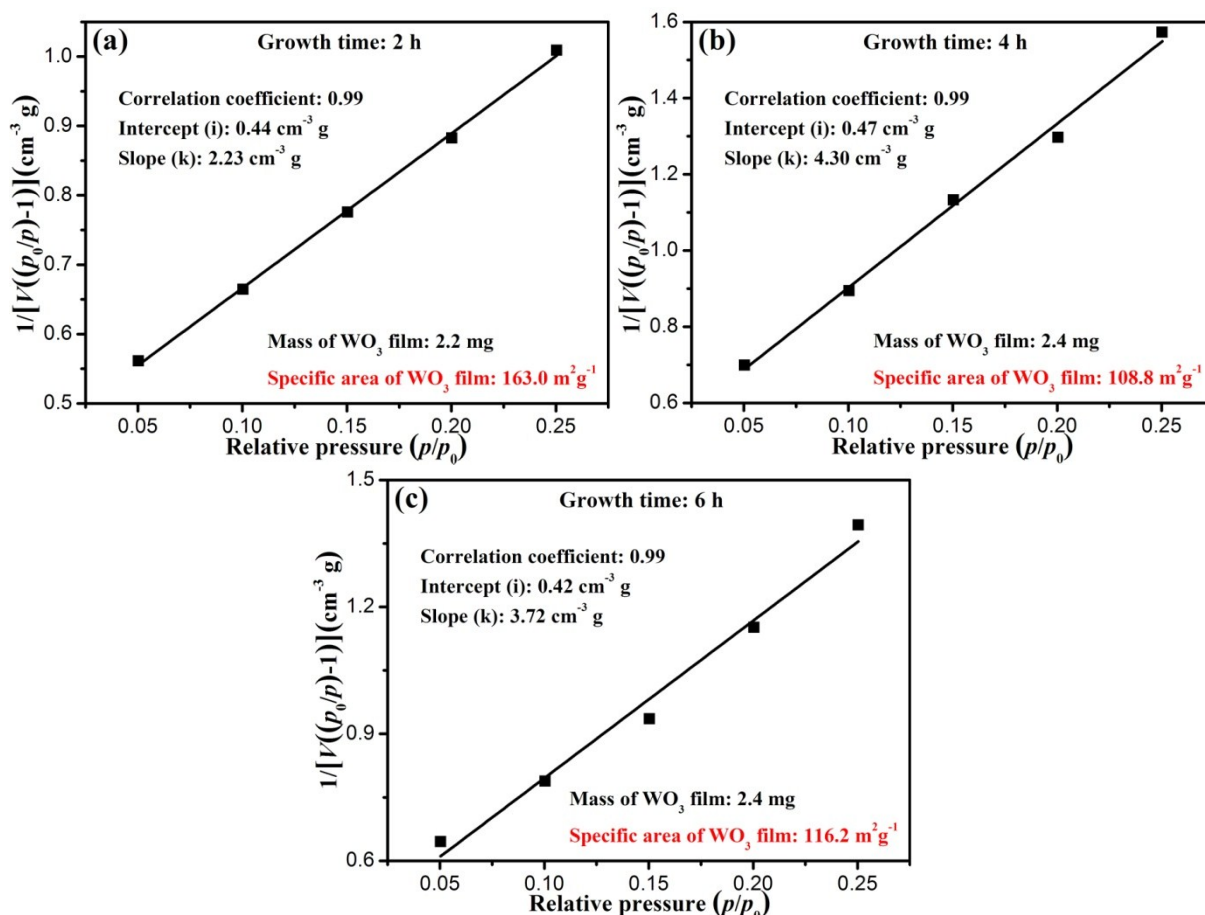

Fig. S3 BET interpretation results of the adsorption curves at  $p/p_0 = 0.05-0.25$  for the samples grown for different time. (a) 2 h, (b) 4 h, (c) 6 h. Before BET measurements, the FTO substrates were cut into small pieces to fit in the test tube. The total mass of each sample (including the WO<sub>3</sub> film and FTO substrates) was measured on a balance. After BET measurements, the WO<sub>3</sub> films grown on FTO substrates were dissolved in KOH solution, and the mass of the FTO substrate was measured. The mass of WO<sub>3</sub> film, which was used to calculate specific area for each sample, was obtained by comparing the mass before and after dissolution of WO<sub>3</sub>.

Table S2. Mass of FTO before and after dissolution of WO<sub>3</sub> film and mass of WO<sub>3</sub> film of samples grown for different time.

| Growth time / h | Mass of FTO with WO <sub>3</sub> film / mg | Mass of bare FTO / mg | Mass of WO <sub>3</sub> film / mg |
|-----------------|--------------------------------------------|-----------------------|-----------------------------------|
| 2               | 220.6                                      | 218.4                 | 2.2                               |
| 4               | 287.7                                      | 285.3                 | 2.4                               |
| 6               | 265.7                                      | 263.3                 | 2.4                               |
